# Supplementary material for: Dual-functional α-NaYb(Mn)F4:Er3+@NaLuF4nanocrystals with highly enhanced red upconversion luminescence
Source: Royal Society of Chemistry journal article supplement (doi:10.1039/c6ra01569g), 2016-01-01
Supplement: c6ra01569g1.pdf [file c6ra01569g1.pdf]

## Supporting Information

### **Dual-functional $\alpha$ -NaYb(Mn)F<sub>4</sub>:Er<sup>3+</sup>@NaLuF<sub>4</sub> nanocrystals with highly enhanced red upconversion luminescence**

Xia Xu <sup>a, b</sup>, Peng Zhang <sup>c</sup>, Qinghai Yuan <sup>c</sup>, Pengpeng Lei <sup>a, b</sup>, Lile Dong <sup>a, b</sup>, Zhuo Wang <sup>a, b</sup>, Xiuling Liu <sup>a</sup>, Shuyan Song <sup>a</sup>, Jing Feng <sup>a, \*</sup>, Hongjie Zhang <sup>a, \*</sup>

<sup>a</sup> *State Key Laboratory of Rare Earth Resource Utilization, Changchun Institute of Applied Chemistry, Chinese Academy of Sciences, 5625 Renmin Street, Changchun 130022, China.*

<sup>b</sup> *University of Chinese Academy of Sciences, Beijing 100049, China*

<sup>c</sup> *Department of Radiology, The Second Hospital of Jilin University, Changchun 130041, China*

\* Corresponding authors. Tel.: +86 431 85262127; fax: +86 431 85698041.

*E-mail addresses:* fengj@ciac.ac.cn (J. Feng), hongjie@ciac.ac.cn (H. Zhang).

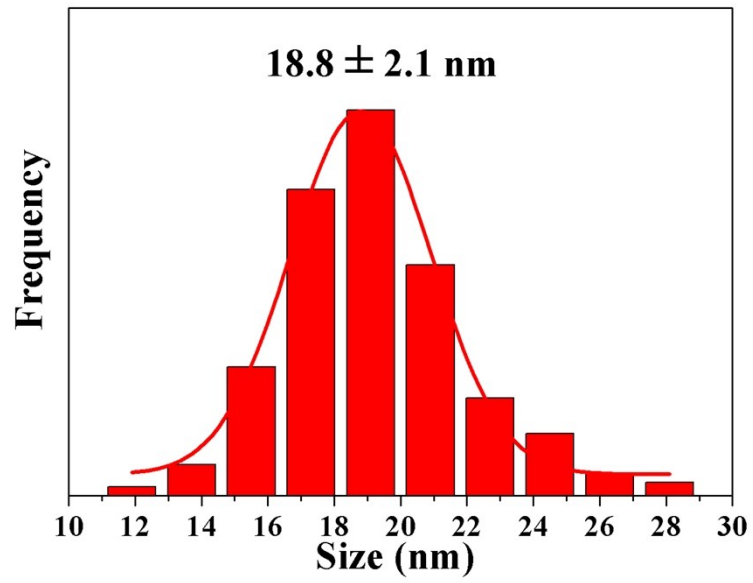

**Fig. S1** Size distribution of  $\alpha$ -NaYb(Mn)F<sub>4</sub>:Er<sup>3+</sup> core nanoparticles.

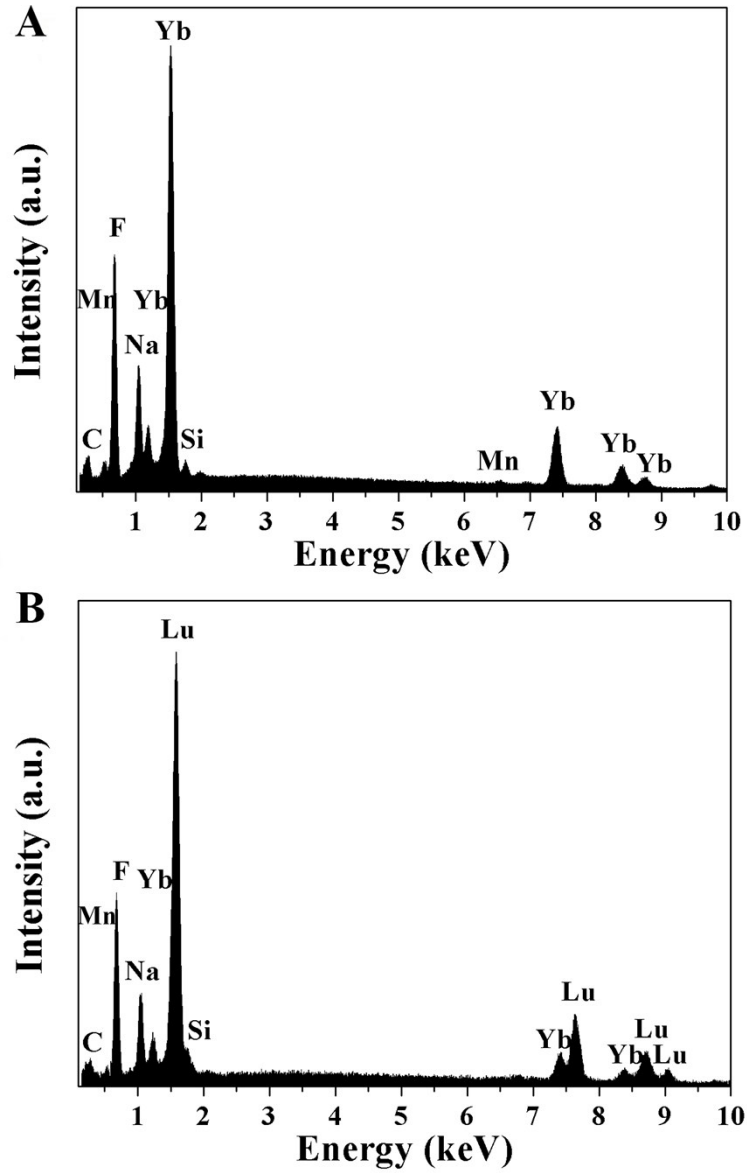

**Fig. S2** EDS patterns of (A)  $\alpha$ -NaYb(Mn)F<sub>4</sub>:Er<sup>3+</sup> core UCNPs and (B)  $\alpha$ -NaYb(Mn)F<sub>4</sub>:Er<sup>3+</sup>@NaLuF<sub>4</sub> core-shell UCNPs.

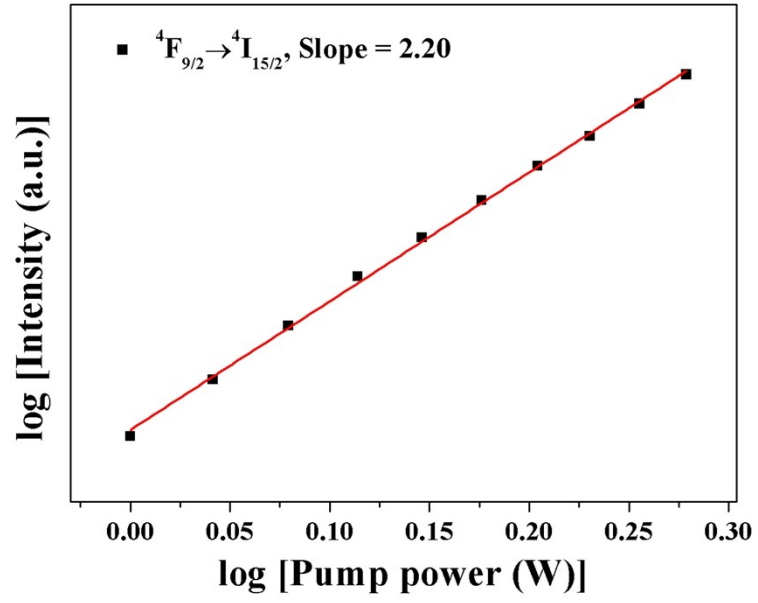

**Fig. S3** Log-log plot of the UCL intensity of  $\alpha$ -NaYb(Mn)F<sub>4</sub>:Er<sup>3+</sup>@NaLuF<sub>4</sub> UCNPs peaked at 651 nm as a function of 980 nm pump power.

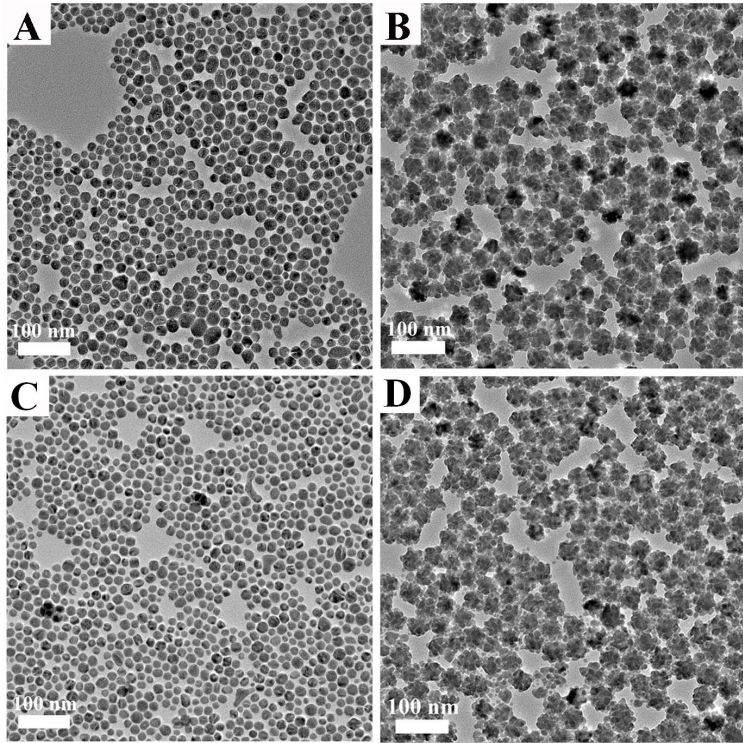

**Fig. S4** TEM images of (A)  $\alpha$ -NaLu(Mn)F<sub>4</sub>:Yb<sup>3+</sup>(18%),Er<sup>3+</sup>, (B)  $\alpha$ -NaLu(Mn)F<sub>4</sub>:Yb<sup>3+</sup>(18%),Er<sup>3+</sup>@NaLuF<sub>4</sub>, (C)  $\alpha$ -NaLu(Mn)F<sub>4</sub>:Yb<sup>3+</sup>(48%),Er<sup>3+</sup> and (D)  $\alpha$ -NaLu(Mn)F<sub>4</sub>:Yb<sup>3+</sup>(48%),Er<sup>3+</sup>@NaLuF<sub>4</sub>.

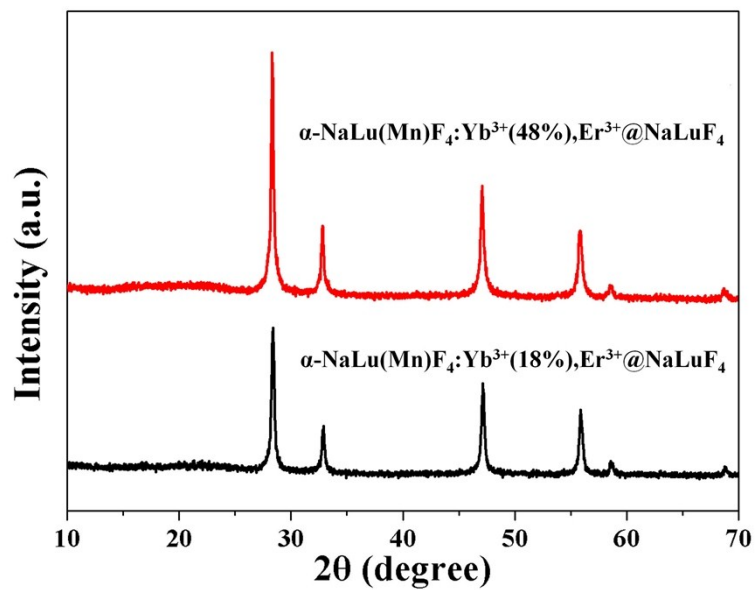

**Fig. S5** XRD patterns of  $\alpha$ -NaLu(Mn)F<sub>4</sub>:Yb<sup>3+</sup>(18%),Er<sup>3+</sup>@NaLuF<sub>4</sub> and  $\alpha$ -NaLu(Mn)F<sub>4</sub>:Yb<sup>3+</sup>(48%),Er<sup>3+</sup>@NaLuF<sub>4</sub>.

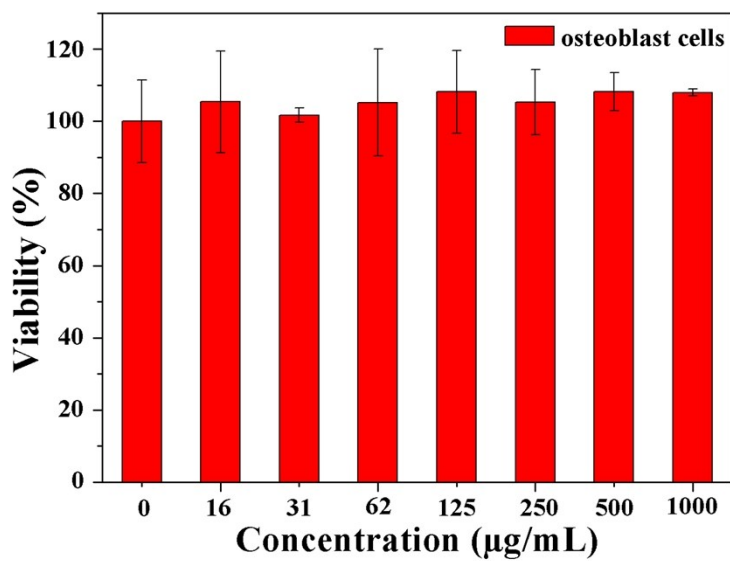

**Fig. S6** Cell viability of osteoblast cells after incubation with increased concentration of  $\alpha$ -NaYb(Mn)F<sub>4</sub>:Er<sup>3+</sup>@NaLuF<sub>4</sub>@PEG UCNPs for 6 h.

**Table S1** The moles of  $\alpha$ -NaYb(Mn)F<sub>4</sub>:Er<sup>3+</sup> core nanocrystals and the shell precursors for preparing  $\alpha$ -NaYb(Mn)F<sub>4</sub>:Er<sup>3+</sup>@NaLuF<sub>4</sub> core-shell UCNPs with different sizes.

| $\alpha$ -NaYb(Mn)F <sub>4</sub> :Er <sup>3+</sup> | Lu(CF <sub>3</sub> COO) <sub>3</sub> | Na(CF <sub>3</sub> COO) | OA:ODE | Size (nm) |
|----------------------------------------------------|--------------------------------------|-------------------------|--------|-----------|
| 1 mmol                                             | 1 mmol                               | 1 mmol                  | 1:1    | 31        |
| 0.5 mmol                                           | 1 mmol                               | 1 mmol                  | 1:1    | 82        |
